# Supplementary material for: Meteorological Evidence for Orbital Forcing of Global Weather and Climate
Source: Preprints.org preprint supplement (doi:10.20944/preprints202210.0337.v1), 2022-10-21

## Annex

This annex contains temperature graphs and bar charts from all continents. The reason for opening a supplementary file is space restriction for the main paper text. Supplement graphs and bar charts add graphics to

paper figure 3 (tropical sea surface temperature), figure 7 (bar charts for 30-year temperature trends) and figure 6 (temperatures of meteorological land stations from all continents). We start with temperature graphs of tropical sea surface temperatures, the latest from 2022.

### February Cooling 12 -16 (2022)

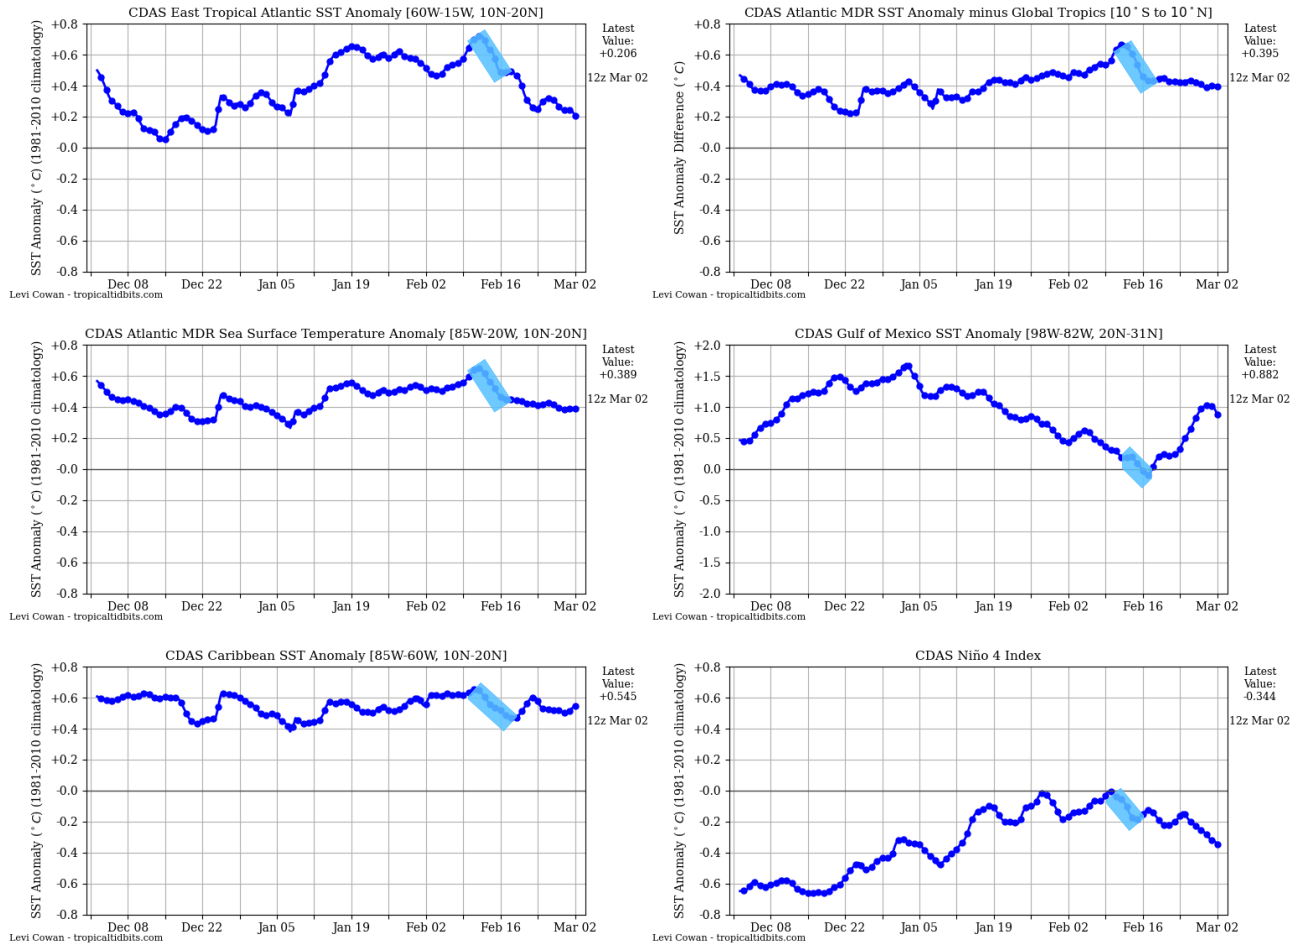

### April 2 - 7 Warming, May 11 - 15 Cooling (2022)

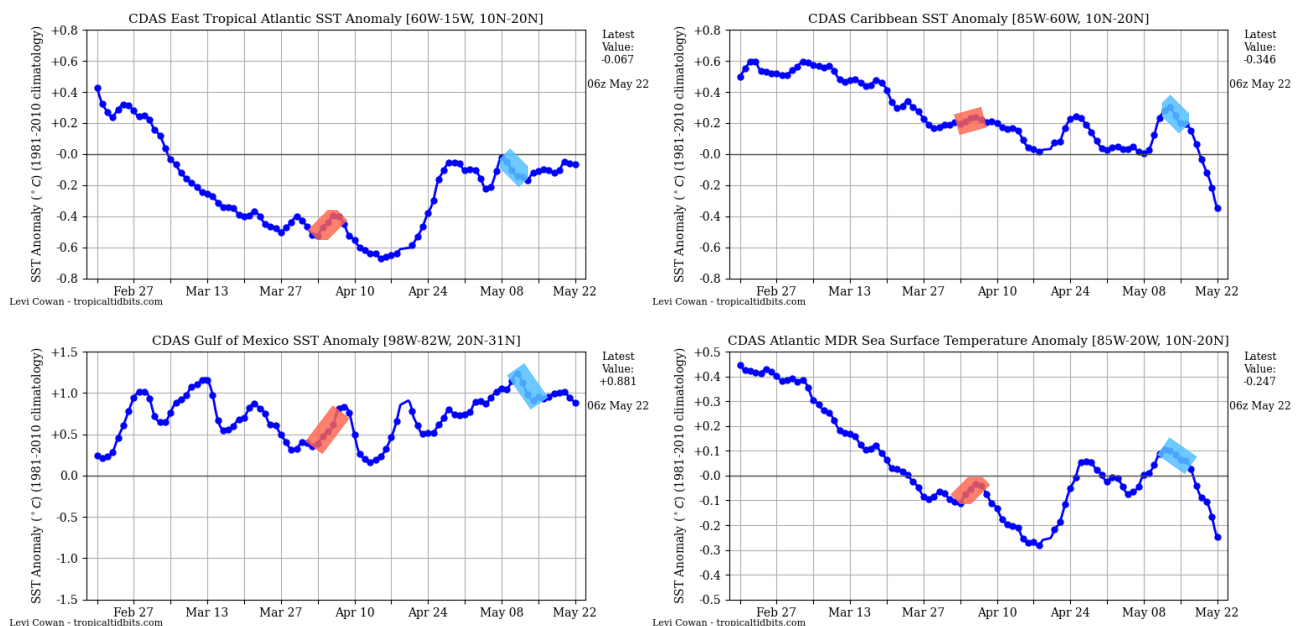

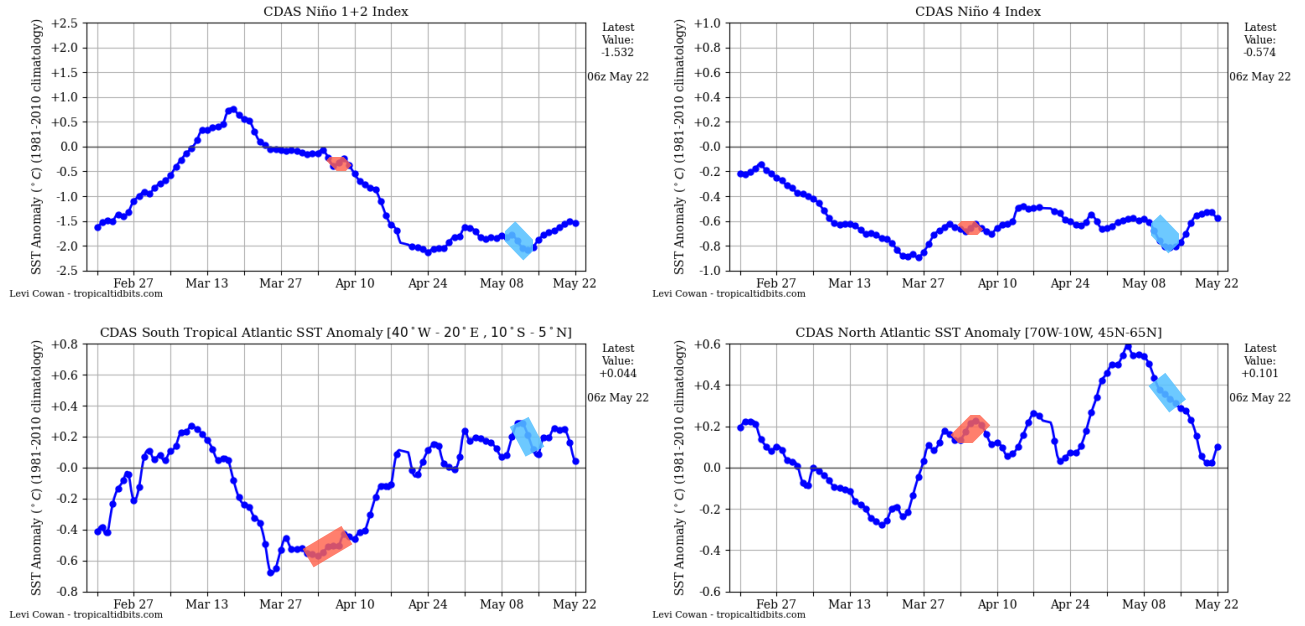

For figure 7, we continue with 30-year bar charts from locations of major continents.

#### February Cooling - 30-year/60-year average

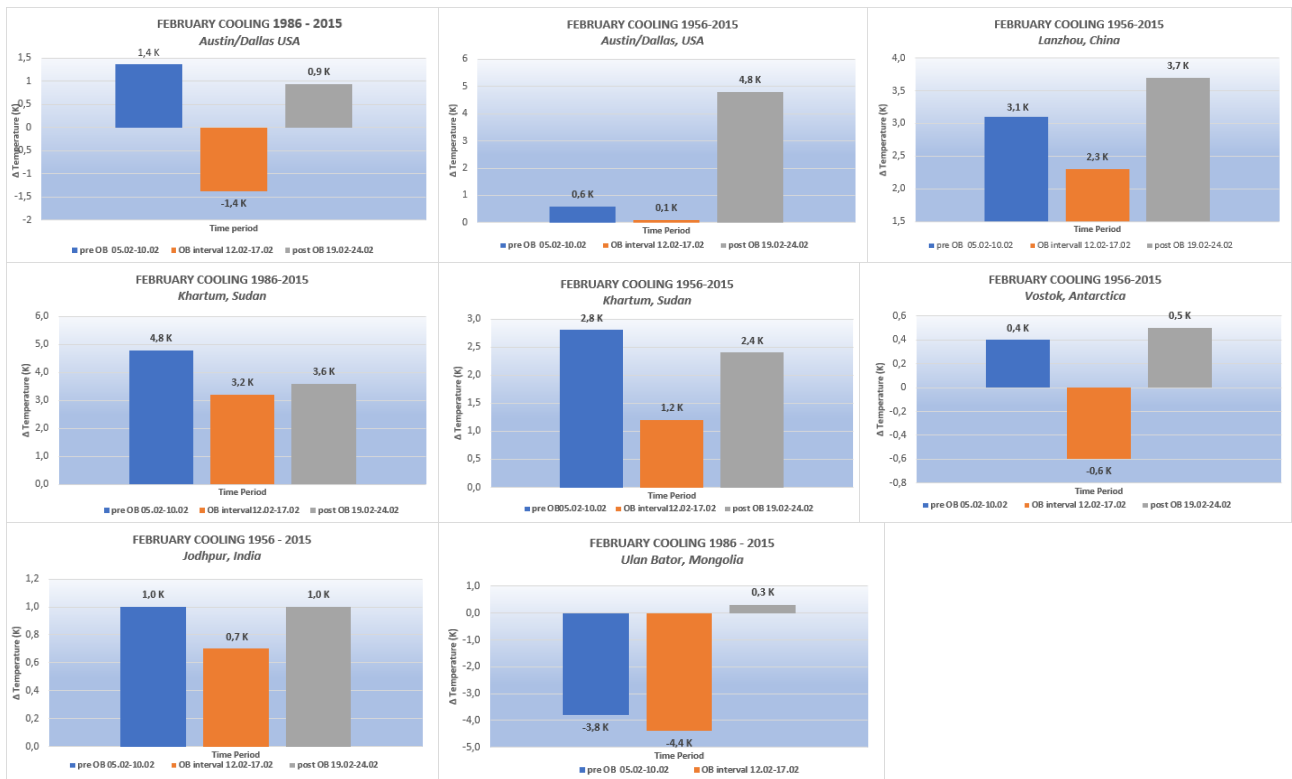

April Warming - 30-year/60-year average

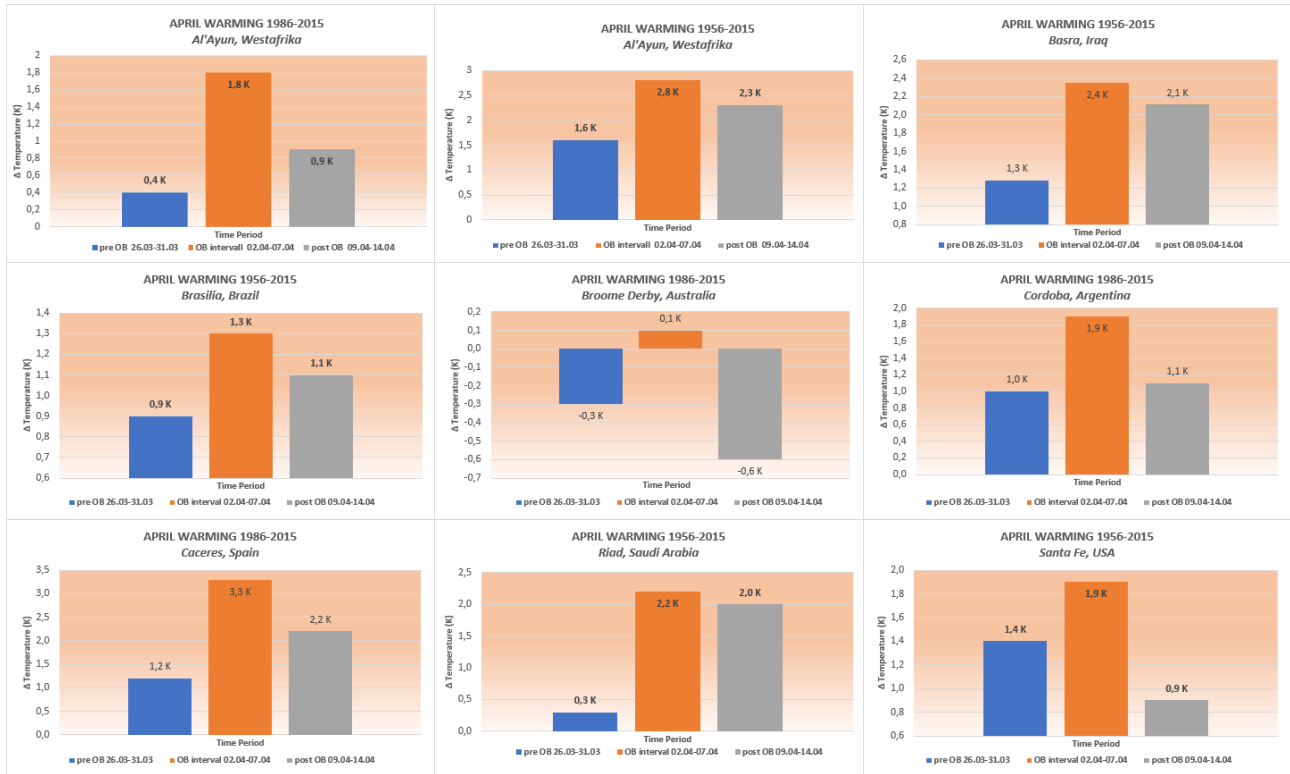

May Cooling - 30-year/60-year average

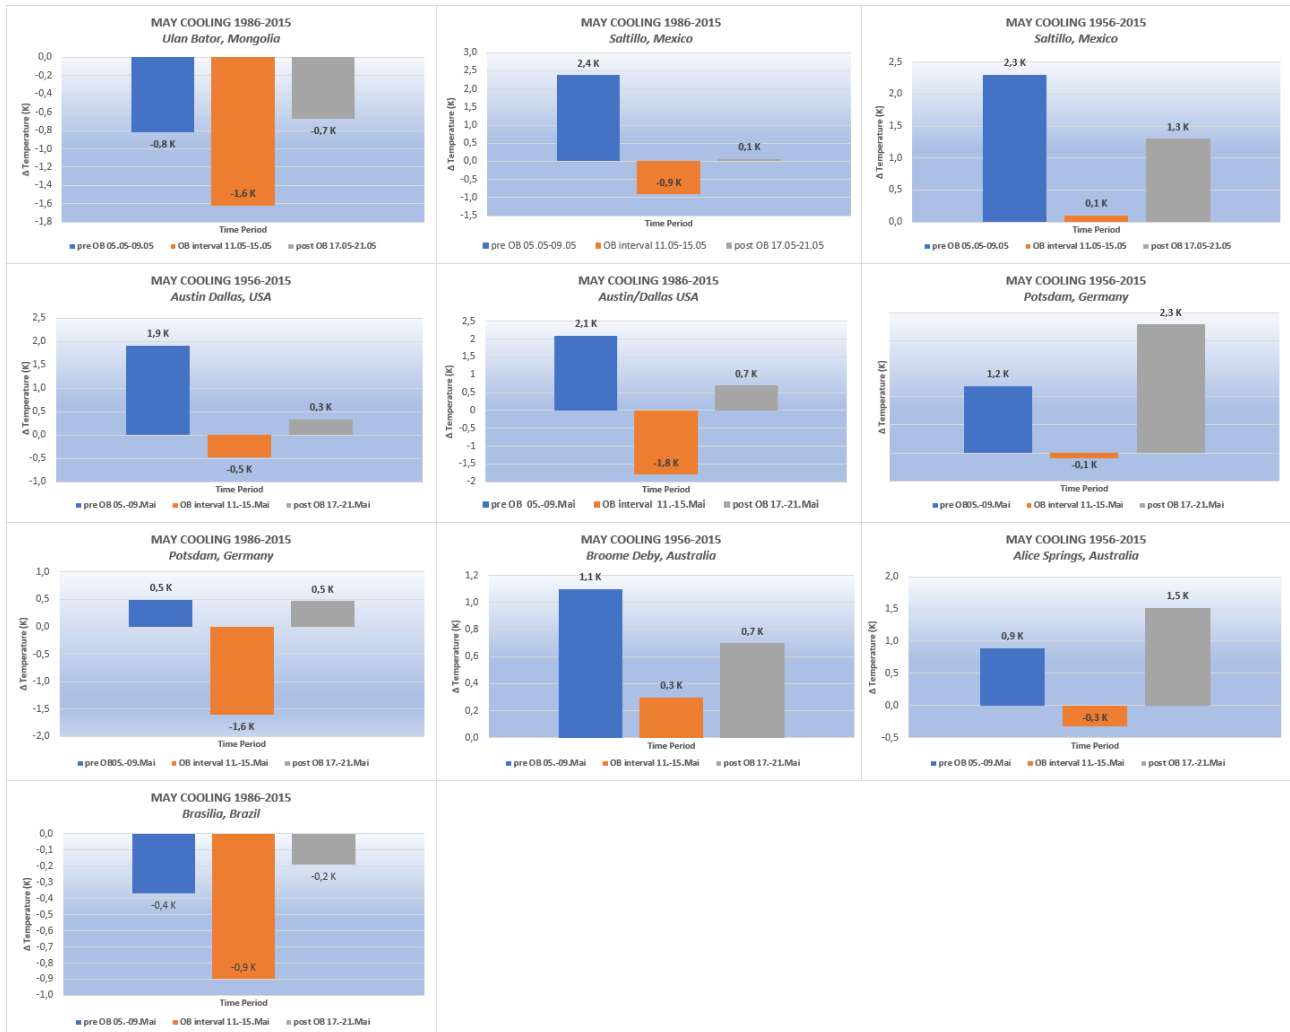

August Cooling- 30-year/60-year average

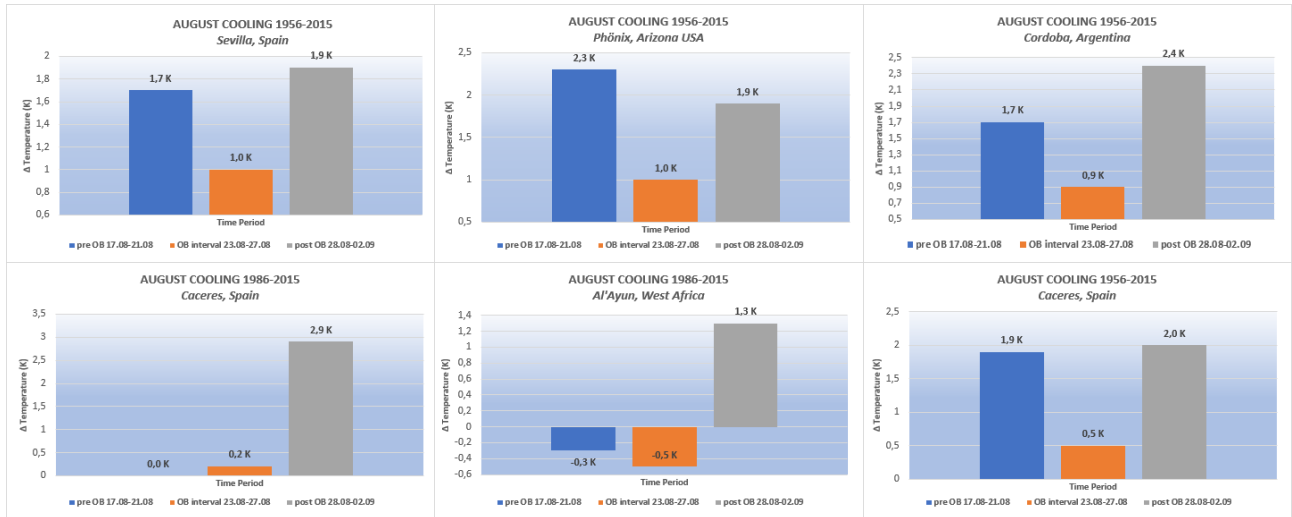

October Warming - 30-year/60-year average

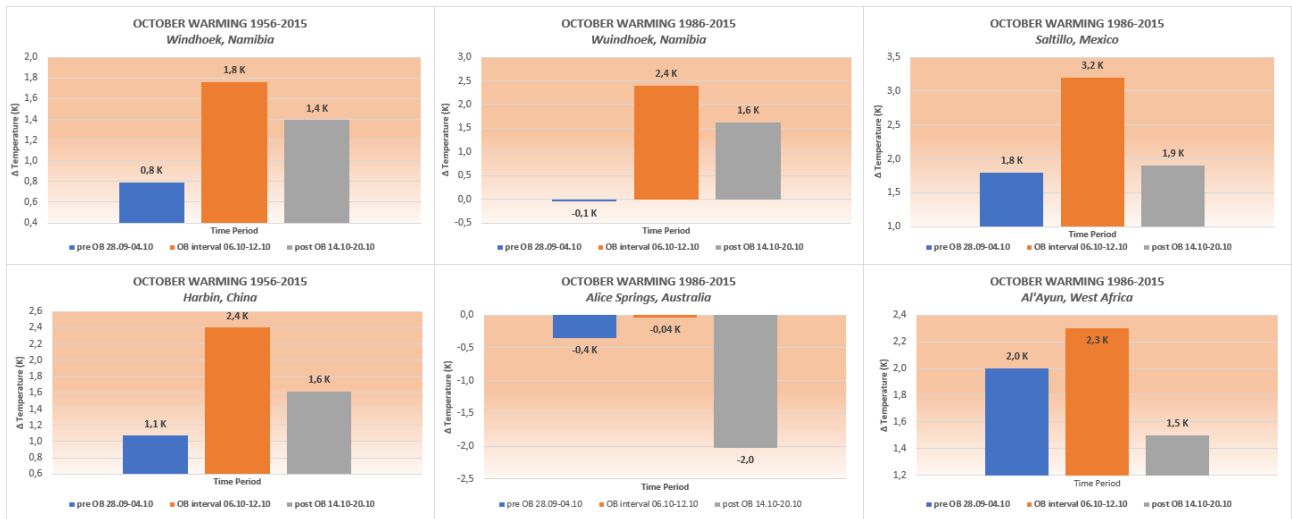

November Cooling - 30-year/60-year average

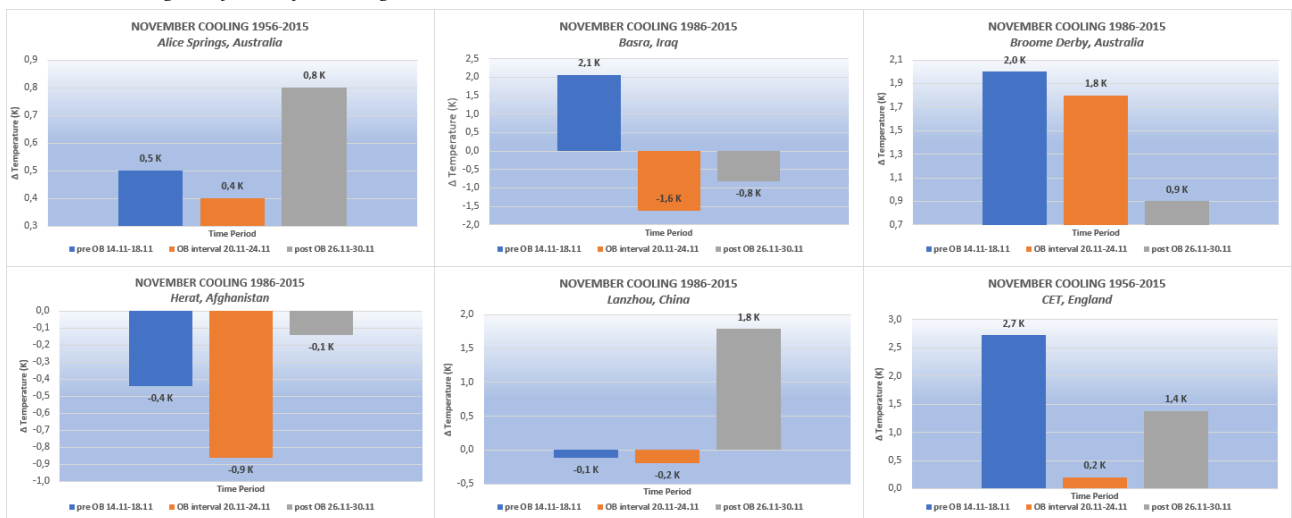

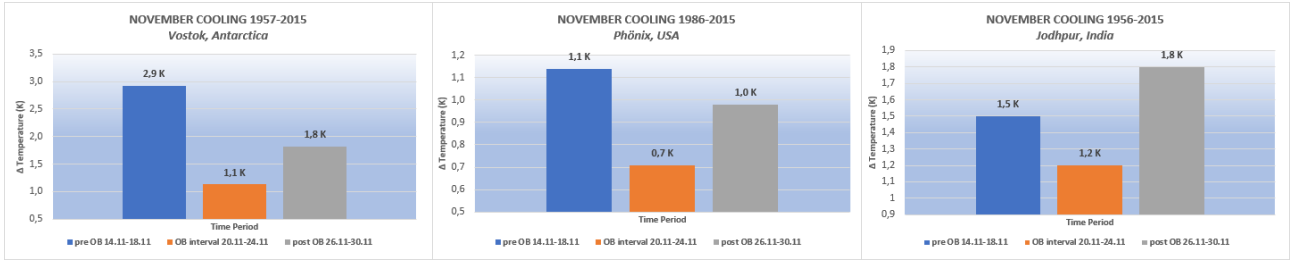

Supplemental charts of figure 6 for 2022.

### February 12 -16 Cooling (2022)

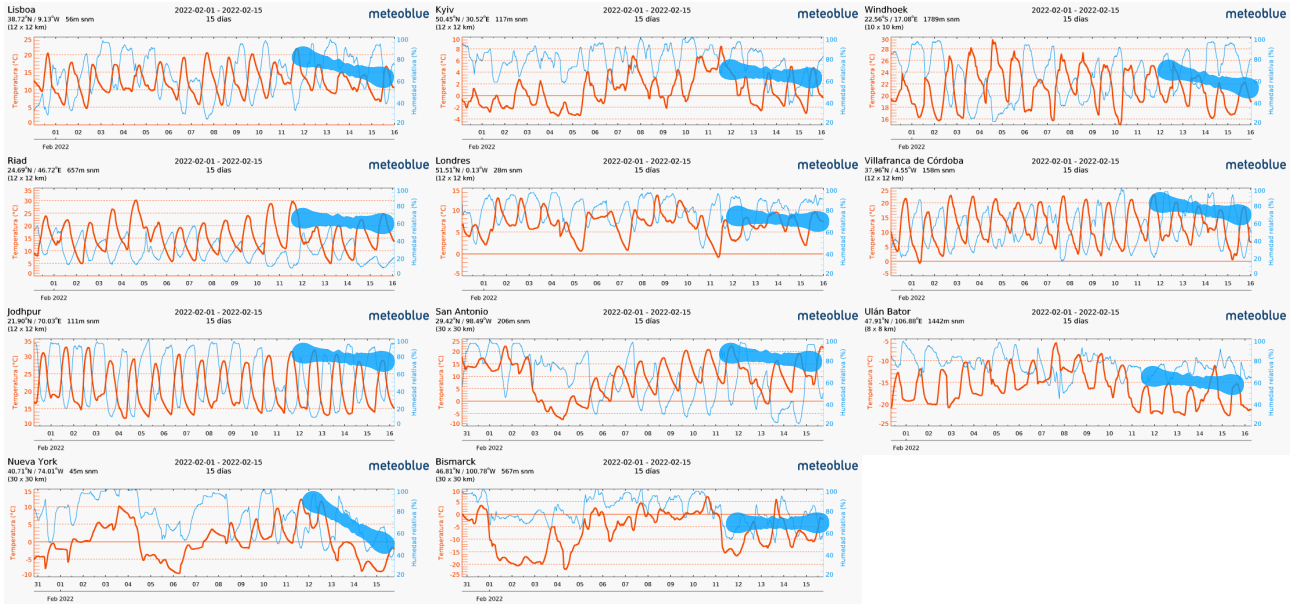

### April 2 - 7 Warming (2022)

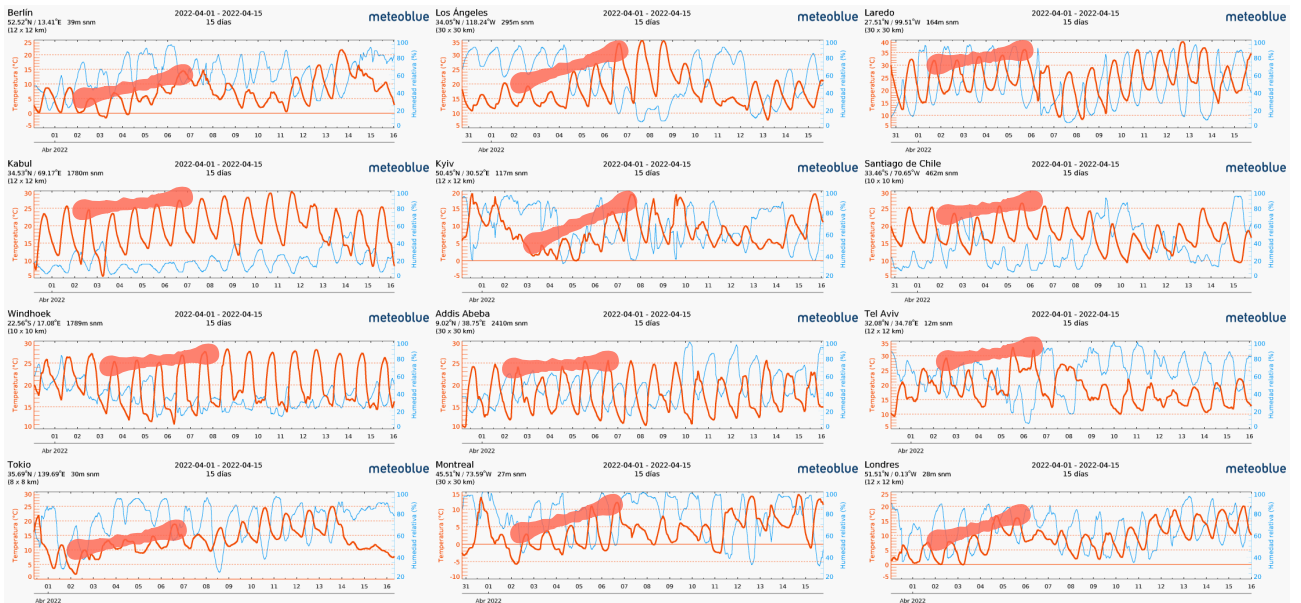

### May 11 - 15 Cooling (2022)

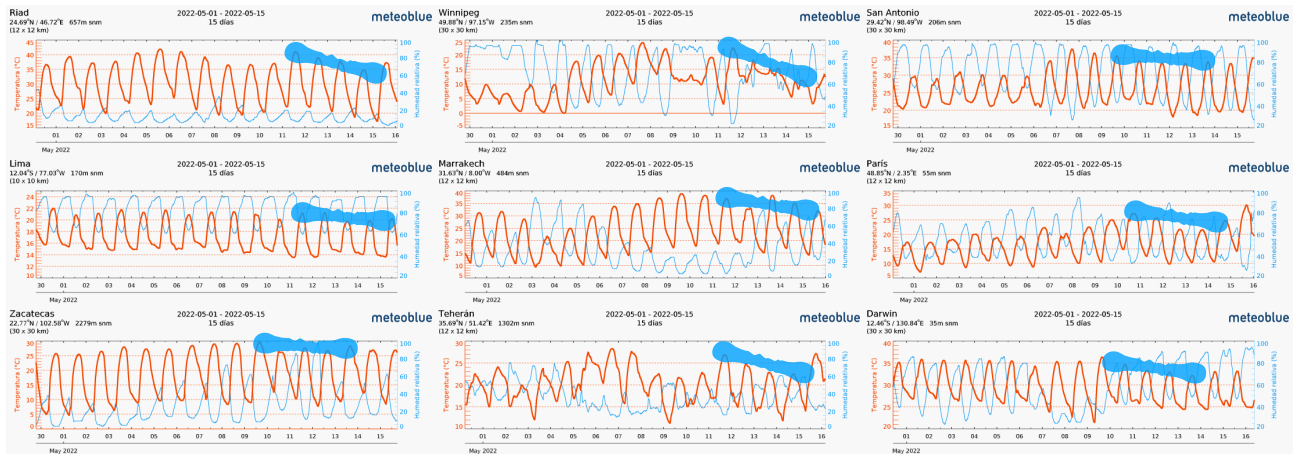

The main paper text contains the temperatures from 6 land stations. Here we add further temperature measurements from 9 land stations, such as Zacatecas,

Lima, Harbin, Jodhpur (Gujarat), Cordoba (Spain), Perth, Bismarck, El Aioun and Basra, according to the OB-forcing month in 2020.

### February 12 -16 Cooling (2020)

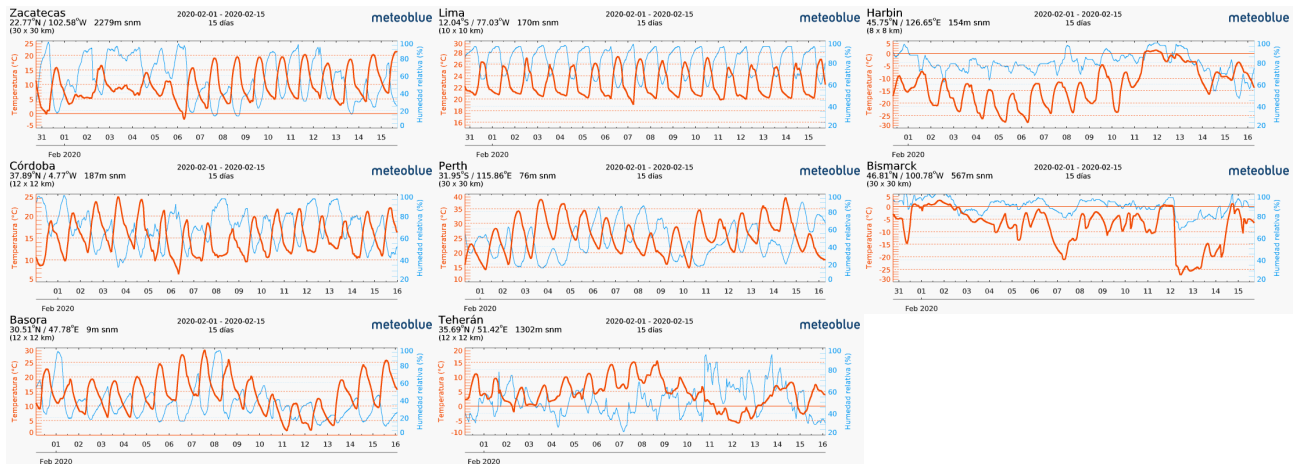

### April 2 - 7 Warming (2020)

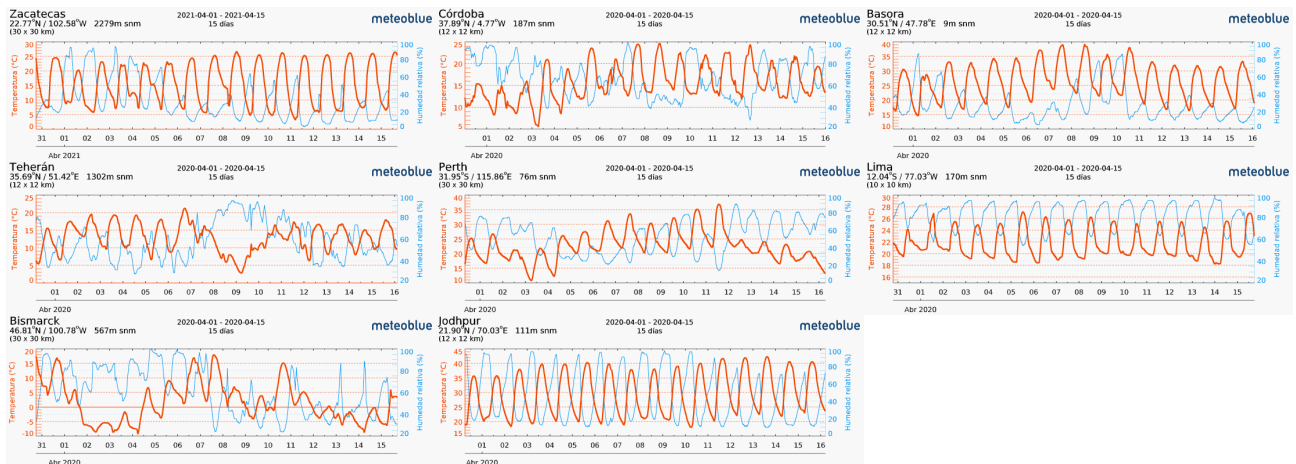

### May 11 - 15 Cooling (2020)

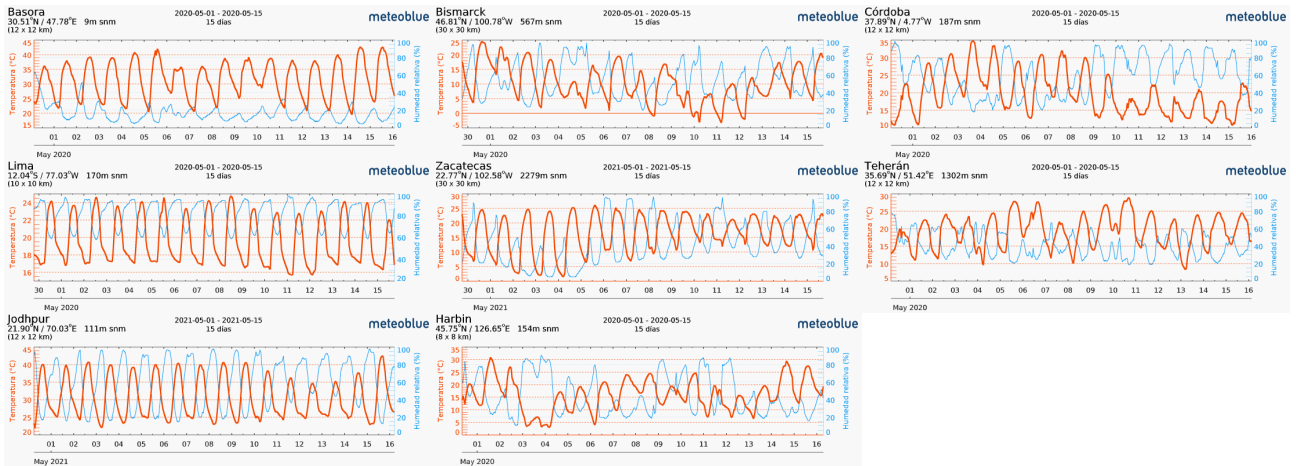

### August 23 - 27 Cooling (2020)

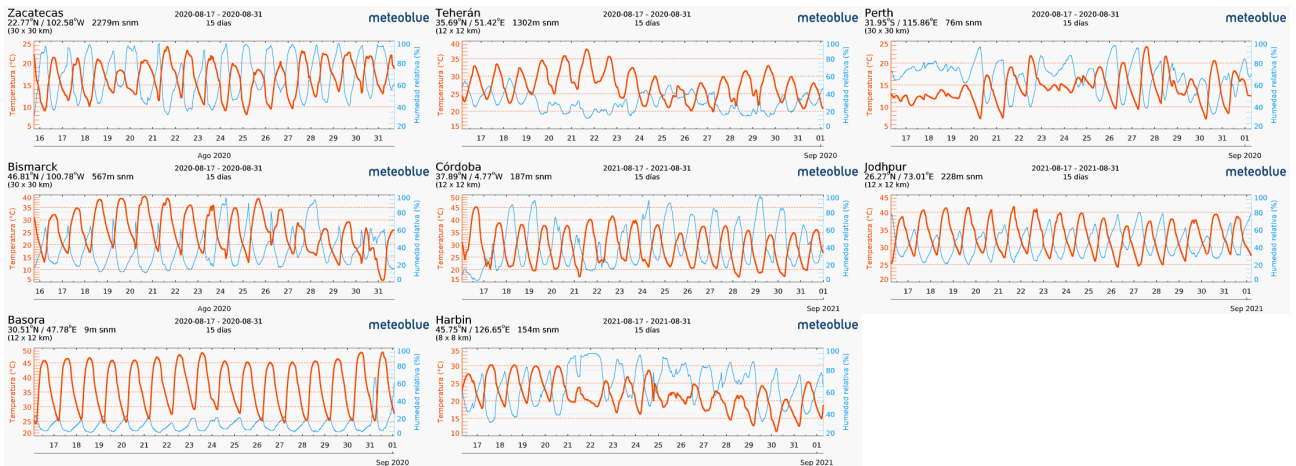

### October 6 - 12 Warming (2020)

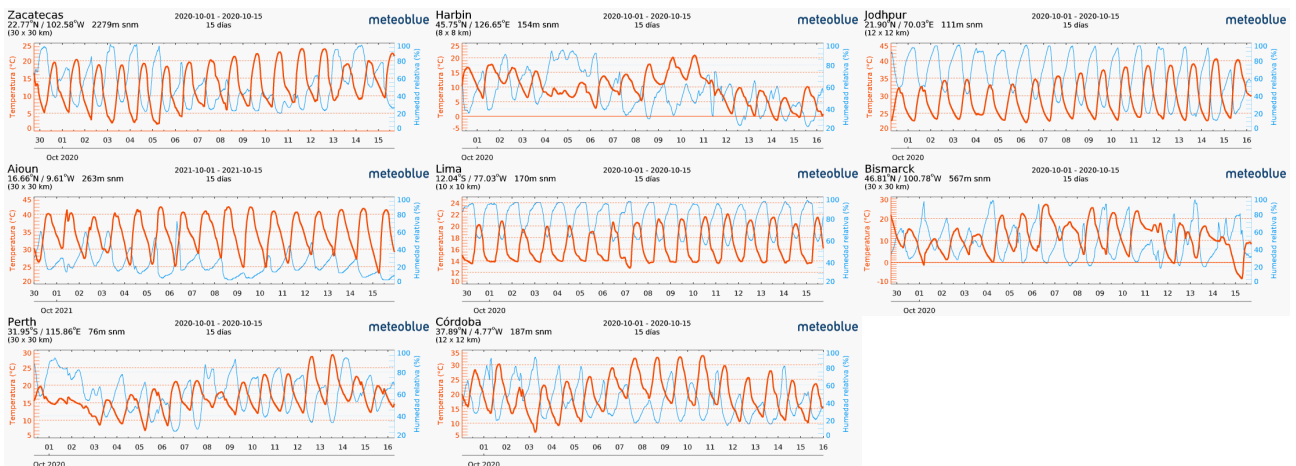

November 21 - 25 Cooling (2020)

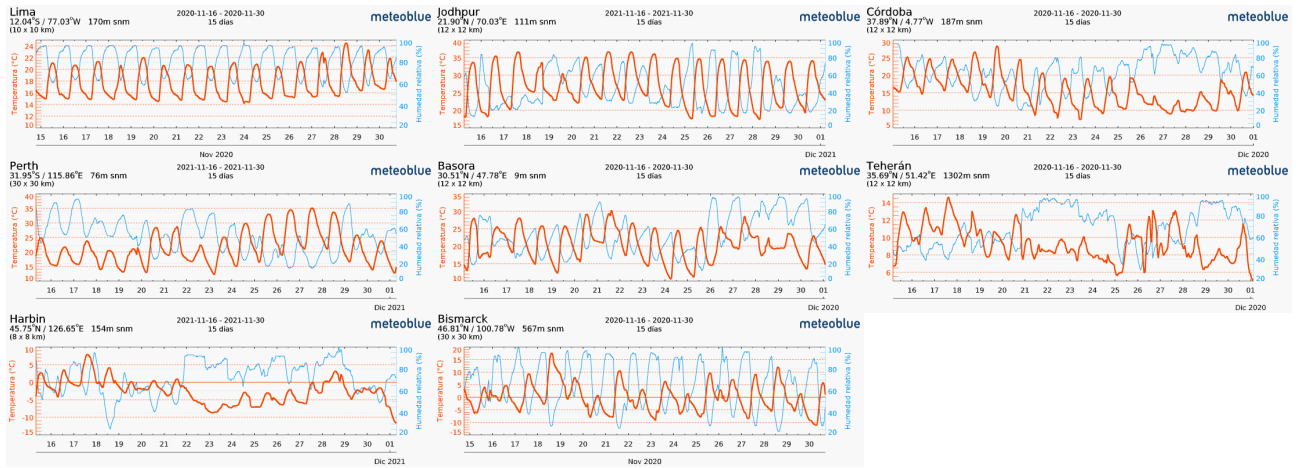

Supplement: Supplementary file 1 [file supplementary › EOO_annex_v1.pdf]
