# Supplementary material for: Meteorological Evidence for Orbital Forcing of Global Weather and Climate
Source: Preprints.org preprint supplement (doi:10.20944/preprints202210.0337.v1), 2022-10-21
Supplement: Supplementary file 1 [file supplementary]

Archive with 2 entries (2 files):
- EOO_annex_v1.pdf
- __MACOSX/._EOO_annex_v1.pdf
